# Supplementary material for: A polysaccharide utilization locus from Flavobacterium johnsoniae enables conversion of recalcitrant chitin
Source: PubMed Central journal article supplement (PMC5127042; doi:10.1186/s13068-016-0674-z), 2016-11-28
Supplement: 13068_2016_674_MOESM1_ESM.pdf [file 13068_2016_674_MOESM1_ESM.pdf]

## Supplementary information

### Tables

Table S1: Bacterial strains used in the study

| Strain                           | Description*                                                                                                                                                         | Source                                    |
|----------------------------------|----------------------------------------------------------------------------------------------------------------------------------------------------------------------|-------------------------------------------|
| <i>E. coli</i> strains           |                                                                                                                                                                      |                                           |
| BL21(DE3)                        | Strain used for production of ChiUL enzymes                                                                                                                          | Invitrogen (Carlsbad, US)                 |
| DH5 $\alpha$ MCR                 | Strain used for general cloning                                                                                                                                      | Life Technologies (Grand Island, NY, USA) |
| HB101                            | Strain used for triparental conjugation                                                                                                                              | [1]                                       |
| Rosetta(DE3) pLysS               | Strain used for production of CusD proteins                                                                                                                          | EMD Millipore (Darmstadt, Germany)        |
| <i>F. johnsoniae</i> strains     |                                                                                                                                                                      |                                           |
| UW101 (ATCC 17061 <sup>T</sup> ) | Wild type                                                                                                                                                            |                                           |
| CJ1808                           | <i>chiA</i> disruption mutant; (Em <sup>r</sup> )                                                                                                                    | [2]                                       |
| CJ1827                           | <i>rpsL2</i> ; (Sm <sup>r</sup> ) “wild type” strains for construction of all deletion mutants                                                                       | [3]                                       |
| CJ2018                           | <i>rpsL2</i> $\Delta$ <i>cusD</i> <sub>II</sub> (Fjoh_4561); (Sm <sup>r</sup> )                                                                                      | This study                                |
| CJ2086                           | <i>rpsL2</i> $\Delta$ <i>cusC</i> <sub>I</sub> (Fjoh_4559); (Sm <sup>r</sup> )                                                                                       | This study                                |
| CJ2121                           | <i>rpsL2</i> $\Delta$ <i>cusD</i> <sub>I</sub> (Fjoh_4558); (Sm <sup>r</sup> )                                                                                       | This study                                |
| CJ2156                           | <i>rpsL2</i> $\Delta$ <i>cusD</i> <sub>I</sub> $\Delta$ <i>cusD</i> <sub>II</sub> ; (Sm <sup>r</sup> )                                                               | This study                                |
| CJ2340                           | <i>rpsL2</i> $\Delta$ <i>cusC</i> <sub>II</sub> (Fjoh_4562); (Sm <sup>r</sup> )                                                                                      | This study                                |
| CJ2349                           | <i>rpsL2</i> $\Delta$ ( <i>cusC</i> <sub>I</sub> - <i>cusD</i> <sub>II</sub> ); (Sm <sup>r</sup> )                                                                   | This study                                |
| CJ2350                           | <i>rpsL2</i> $\Delta$ <i>chiB</i> (Fjoh_4560); (Sm <sup>r</sup> )                                                                                                    | This study                                |
| CJ2453                           | <i>rpsL2</i> $\Delta$ ( <i>cusS</i> - <i>cusR</i> ); (Sm <sup>r</sup> )                                                                                              | This study                                |
| CJ2456                           | <i>rpsL2</i> $\Delta$ Fjoh_4556; (Sm <sup>r</sup> )                                                                                                                  | This study                                |
| CJ2457                           | <i>rpsL2</i> $\Delta$ Fjoh_4565; (Sm <sup>r</sup> )                                                                                                                  | This study                                |
| CJ2463                           | <i>rpsL2</i> $\Delta$ <i>nagB</i> (Fjoh_4557); (Sm <sup>r</sup> )                                                                                                    | This study                                |
| CJ2590                           | <i>rpsL2</i> $\Delta$ <i>cusC</i> <sub>I</sub> $\Delta$ <i>cusC</i> <sub>II</sub> ; (Sm <sup>r</sup> )                                                               | This study                                |
| CJ2676                           | <i>rpsL2</i> $\Delta$ ( <i>cusC</i> <sub>II</sub> - <i>cusD</i> <sub>II</sub> ); (Sm <sup>r</sup> )                                                                  | This study                                |
| CJ2677                           | <i>rpsL2</i> $\Delta$ ( <i>cusC</i> <sub>I</sub> - <i>cusD</i> <sub>I</sub> ); (Sm <sup>r</sup> )                                                                    | This study                                |
| CJ2679                           | <i>rpsL2</i> $\Delta$ ( <i>cusC</i> <sub>I</sub> - <i>cusD</i> <sub>I</sub> ) $\Delta$ ( <i>cusC</i> <sub>II</sub> - <i>cusD</i> <sub>II</sub> ); (Sm <sup>r</sup> ) | This study                                |

\*Antibiotic resistance phenotypes: ampicillin, Ap<sup>r</sup>; erythromycin, Em<sup>r</sup>; kanamycin, Km<sup>r</sup>; streptomycin, Sm<sup>r</sup>; tetracycline, Tc<sup>r</sup>. Unless indicated otherwise, the antibiotic resistance phenotypes are those expressed in *E. coli*. The antibiotic resistance phenotypes given in parentheses are those expressed in *F. johnsoniae* but not in *E. coli*

Table S2: Plasmids used in this study

| Plasmid      | Description*                                                                                                                                                                                          | Source     |
|--------------|-------------------------------------------------------------------------------------------------------------------------------------------------------------------------------------------------------|------------|
| pCP23        | <i>E. coli</i> / <i>F. johnsoniae</i> shuttle vector; Ap <sup>r</sup> (Tc <sup>r</sup> )                                                                                                              | [4]        |
| pDE01        | 1.7 kbp region upstream of <i>nagB</i> amplified with primers 1626 and 1627 and cloned into XbaI and SalI sites of pRR51; Ap <sup>r</sup> (Em <sup>r</sup> )                                          | This study |
| pDE02        | Construct used to delete <i>nagB</i> ; 1.7 kbp region downstream of <i>nagB</i> amplified with primers 1628 and 1629 and cloned into SalI and SphI sites of pDE01; Ap <sup>r</sup> (Em <sup>r</sup> ) | This study |
| pETite N-His | Expression plasmid, including an N-terminal His <sub>6</sub> -tag and TEV protease cleavage site; (Km <sup>r</sup> )                                                                                  | Lucigen    |
| pLW01        | pCP23 carrying <i>cusD</i> <sub>I</sub> ; Ap <sup>r</sup> (Tc <sup>r</sup> )                                                                                                                          | This study |
| pNIC-CH      | Expression plasmid, including a C-terminal His <sub>6</sub> -tag; (Km <sup>r</sup> )                                                                                                                  | Addgene    |
| pRK2013      | Helper plasmid for triparental conjugation; IncP Tra <sup>+</sup> Km <sup>r</sup>                                                                                                                     | [5]        |

|        |                                                                                                                                                                                                                                |            |
|--------|--------------------------------------------------------------------------------------------------------------------------------------------------------------------------------------------------------------------------------|------------|
| pRR51  | <i>rpsL</i> -containing suicide vector for construction of deletions; Ap <sup>r</sup> (Em <sup>r</sup> )                                                                                                                       | [3]        |
| pSSK05 | pCP23 carrying <i>chiA</i> ; Ap <sup>r</sup> (Tc <sup>r</sup> )                                                                                                                                                                | [2]        |
| pSSK08 | 1.8 kbp region downstream of <i>cusD<sub>II</sub></i> amplified with primers 1055 and 1056 and cloned into BamHI and Sall sites of pRR51; Ap <sup>r</sup> (Em <sup>r</sup> )                                                   | This study |
| pSSK09 | Construct used to delete <i>cusD<sub>II</sub></i> ; 1.3 kbp region upstream of <i>cusD<sub>II</sub></i> amplified with primers 1057 and 1058 and cloned into Sall and SphI sites of pSSK08; Ap <sup>r</sup> (Em <sup>r</sup> ) | This study |
| pSSK13 | 1.7 kbp region downstream of <i>cusD<sub>I</sub></i> amplified with primers 1166 and 1167 and cloned into XbaI and Sall sites of pRR51; Ap <sup>r</sup> (Em <sup>r</sup> )                                                     | This study |
| pSSK15 | 1.5 kbp region downstream of <i>cusC<sub>I</sub></i> amplified with primers 1170 and 1052 and cloned into XbaI and Sall sites of pRR51; Ap <sup>r</sup> (Em <sup>r</sup> )                                                     | This study |
| pSSK17 | Construct used to delete <i>cusC<sub>I</sub></i> ; 1.8 kbp region upstream of <i>cusC<sub>I</sub></i> amplified with primers 1053 and 1054 and cloned into Sall and SphI sites of pSSK15; Ap <sup>r</sup> (Em <sup>r</sup> )   | This study |
| pSSK18 | Construct used to delete <i>cusD<sub>I</sub></i> ; 1.7 kbp region upstream of <i>cusD<sub>I</sub></i> amplified with primers 1168 and 1169 and cloned into Sall and SphI sites of pSSK13; Ap <sup>r</sup> (Em <sup>r</sup> )   | This study |
| pSSK29 | 1.9 kbp region downstream of <i>cusC<sub>II</sub></i> amplified with primers 1250 and 1251 and cloned into XbaI and Sall sites of pRR51; Ap <sup>r</sup> (Em <sup>r</sup> )                                                    | This study |
| pSSK33 | Construct used to delete <i>cusC<sub>II</sub></i> ; 1.8 kbp region upstream of <i>cusC<sub>II</sub></i> amplified with primers 1252 and 1253 and cloned into Sall and SphI sites of pSSK29; Ap <sup>r</sup> (Em <sup>r</sup> ) | This study |
| pSSK38 | 1.5 kbp region upstream of <i>chiB</i> amplified with primers 1423 and 1424 and cloned into BamHI and Sall sites of pRR51; Ap <sup>r</sup> (Em <sup>r</sup> )                                                                  | This study |
| pSSK40 | Construct used to delete <i>chiB</i> ; 1.6 kbp region downstream of <i>chiB</i> amplified with primers 1425 and 1426 and cloned into Sall and SphI sites of pSSK38; Ap <sup>r</sup> (Em <sup>r</sup> )                         | This study |
| pSSK49 | 1,518-bp NheI-XhoI fragment spanning <i>cusD<sub>I</sub></i> amplified with primer 1561 and 1562 and inserted into pET28a                                                                                                      | This study |
| pSSK50 | 1,461-bp NheI-XhoI fragment spanning <i>cusD<sub>II</sub></i> amplified with primer 1563 and 1564 and inserted into pET28a                                                                                                     | This study |
| pYT248 | 2.1 kbp region upstream of Fjoh_4556 amplified with primers 1622 and 1623 and cloned into BamHI and Sall sites of pRR51; Ap <sup>r</sup> (Em <sup>r</sup> )                                                                    | This study |
| pYT249 | 2.0 kbp region upstream of <i>cusS</i> amplified with primers 1630 and 1631 and cloned into BamHI and Sall sites of pRR51; Ap <sup>r</sup> (Em <sup>r</sup> )                                                                  | This study |
| pYT250 | 1.9 kbp region upstream of Fjoh_4565 amplified with primers 1634 and 1635 and cloned into BamHI and Sall sites of pRR51; Ap <sup>r</sup> (Em <sup>r</sup> )                                                                    | This study |
| pYT255 | Construct used to delete Fjoh_4556; 2.0 kbp region downstream of Fjoh_4556 amplified with primers 1624 and 1625 and cloned into Sall and SphI sites of pYT248; Ap <sup>r</sup> (Em <sup>r</sup> )                              | This study |
| pYT256 | Construct used to delete <i>cusS - cusR</i> ; 1.8 kbp region downstream of <i>cusR</i> amplified with primers 1632 and 1633 and cloned into Sall and SphI sites of pYT249; Ap <sup>r</sup> (Em <sup>r</sup> )                  | This study |
| pYT257 | Construct used to delete Fjoh_4565; 1.8 kbp region downstream of Fjoh_4565 amplified with primers 1636 and 1637 and cloned into Sall and SphI sites of pYT250; Ap <sup>r</sup> (Em <sup>r</sup> )                              | This study |
| pYT259 | pCP23 carrying <i>cusS - cusR</i> ; Ap <sup>r</sup> (Tc <sup>r</sup> )                                                                                                                                                         | This study |
| pYT260 | pCP23 carrying Fjoh_4565; Ap <sup>r</sup> (Tc <sup>r</sup> )                                                                                                                                                                   | This study |
| pYT351 | pCP23 carrying <i>cusC<sub>I</sub> - cusD<sub>I</sub></i> ; Ap <sup>r</sup> (Tc <sup>r</sup> )                                                                                                                                 | This study |
| pYT352 | pCP23 carrying <i>cusC<sub>II</sub> - cusD<sub>II</sub></i> ; Ap <sup>r</sup> (Tc <sup>r</sup> )                                                                                                                               | This study |
| pYT353 | pCP23 carrying <i>cusC<sub>I</sub></i> ; Ap <sup>r</sup> (Tc <sup>r</sup> )                                                                                                                                                    | This study |

\*Antibiotic resistance phenotypes: ampicillin, Ap<sup>r</sup>; erythromycin, Em<sup>r</sup>; kanamycin, Km<sup>r</sup>; streptomycin, Sm<sup>r</sup>; tetracycline, Tc<sup>r</sup>. Unless indicated otherwise, the antibiotic resistance phenotypes are those expressed in *E. coli*. The antibiotic resistance phenotypes given in parentheses are those expressed in *F. johnsoniae* but not in *E. coli*.

Table S3: Primers used in this study

| Primers                | Sequence and Description                                                                                                                                                                |
|------------------------|-----------------------------------------------------------------------------------------------------------------------------------------------------------------------------------------|
| ChiA_F_F               | 5' TTAAGAAGGAGATATACTATGAAAGTTGTTGGTTATTATGCCCAGTGG 3'; forward primer used to clone ChiA_F (Fjoh_4555); LIC overhang underlined                                                        |
| ChiA_F_R               | GTAATAGCAGTGAACCTGAGCAAAGCAGCGCACCATCATCACCACCATT 3'; reverse primer used to clone ChiA_F (Fjoh_4555); LIC overhang underlined                                                          |
| ChiA_N_F               | 5' TTAAGAAGGAGATATACTATGAAAGTTGTTGGTTATTATGCCCAGTGG 3'; forward primer used to clone ChiA_N (Fjoh_4555); LIC overhang underlined                                                        |
| ChiA_N_R               | GATACCAGCTTTGGTAGCGTGGTTGCGCACCATCATCACCACCATT 3'; reverse primer used to clone ChiA_N (Fjoh_4555); LIC overhang underlined                                                             |
| ChiA_M_F               | 5' TTAAGAAGGAGATATACTATGGGTAGCGTGGTTCCGGGTAC 3'; forward primer used to clone ChiA_M (Fjoh_4555); LIC overhang underlined                                                               |
| ChiA_M_R               | CAACCGTGAGCACCACATCGTTTTATTGCGCACCATCATCACCACCATT 3'; reverse primer used to clone ChiA_M (Fjoh_4555); LIC overhang underlined                                                          |
| ChiA_C_F               | 5' TTAAGAAGGAGATATACTATGGTTGTGATTAAGCAACCGACAATAAAAAG 3'; forward primer used to clone ChiA_C (Fjoh_4555); LIC overhang underlined                                                      |
| ChiA_C_R               | GTAATAGCAGTGAACCTGAGCAAAGCAGCGCACCATCATCACCACCATT 3'; reverse primer used to clone ChiA_C (Fjoh_4555); LIC overhang underlined                                                          |
| GH20_F                 | 5' TTAAGAAGGAGATATACTATGCAGATGCAGAAAAGAACAGCTGAATC 3'; forward primer used to clone GH20 (Fjoh_4556); LIC overhang underlined                                                           |
| GH20_R                 | CGTTTATGAAAGCCTGAAAAAAGTATTGCGCACCATCATCACCACCATT 3'; reverse primer used to clone GH20 (Fjoh_4556); LIC overhang underlined                                                            |
| ChiB_F                 | 5' TTAAGAAGGAGATATACTATGACCAGCGAAAAAGAAAATAACCCGGAAG 3'; forward primer used to clone ChiB (Fjoh_4560); LIC overhang underlined                                                         |
| ChiB_R                 | CAAAACCAGCGGTATGTGTGGCAACGCGCACCATCATCACCACCATT 3'; reverse primer used to clone ChiB (Fjoh_4560); LIC overhang underlined                                                              |
| CusD <sub>I</sub> _F   | 5' CATCATCACCACCATCAGGAGAACCTGTACTTCCAGGGCAATGGTATTACACTTCTGATTTG 3'; forward primer used to clone CusD <sub>I</sub> (Fjoh_4558); LIC overhang and TEV site underlined                  |
| CusD <sub>I</sub> _R   | 5' GTGGCGCGCTCTATTAGAAATTCGAGCATTACATCC 3'; reverse primer used to clone CusD <sub>I</sub> (Fjoh_4558); LIC overhang underlined                                                         |
| CusD <sub>II</sub> _F1 | 5' CATCATCACCACCATCAGGAGAACCTGTACTTCCAGGGCCTGATAAAGGATCCGGTTGCG 3'; forward primer used to clone CusD <sub>II</sub> (Fjoh_4561) residues 26-505; LIC overhang and TEV site underlined   |
| CusD <sub>II</sub> _F2 | 5' CATCATCACCACCATCAGGAGAACCTGTACTTCCAGGGCCAAATCCTG CAGGTCAGCTTAC 3'; forward primer used to clone CusD <sub>II</sub> (Fjoh_4561) residues 35-505; LIC overhang and TEV site underlined |
| CusD <sub>II</sub> _R  | 5' GTGGCGCGCTCTATTAGTTTACATCCACCAAACCTTAC 3'; reverse primer used to clone CusD <sub>II</sub> (Fjoh_4561); LIC overhang underlined                                                      |
| 1052                   | 5' GCTAGGTCGACACAGGTGATGCAAGAAATGCAGGC 3'; reverse primer used in construction of pSSK15; SalI site underlined                                                                          |
| 1053                   | 5' GCTAGGTCGACTTTTACCTGTGCAAGCGAAACCTG 3'; forward primer used in construction of pSSK17; SalI site underlined                                                                          |
| 1054                   | 5' GCTAGGCATGCGCTCCTGCAAGTCAGGCAAGTATT 3'; reverse primer used in construction of pSSK17; SphI site underlined                                                                          |
| 1055                   | 5' GCTAGGGATCCTTTTACCTGTGCAAGCGAAACCTG 3'; forward primer used in construction of pSSK08; BamHI site underlined                                                                         |
| 1056                   | 5' GCTAGGTCGACGCTCCTGCAAGTCAGGCAAGTATT 3'; reverse primer used in construction of pSSK08; SalI site underlined                                                                          |
| 1057                   | 5' GCTAGGTCGACTGTAAGCTGACCTGCAGGATTTGG 3'; forward primer used in construction of pSSK09; SalI site underlined                                                                          |
| 1058                   | 5' GCTAGGCATGCAATGCACCGGGAGCTTACAAGAAC 3'; reverse primer used in construction of pSSK09; SphI site underlined                                                                          |
| 1166                   | 5' GCTAGTCTAGATACAATTTTCGATATCCTCCTGCCC 3'; forward primer used in construction of pSSK13; XbaI site underlined                                                                         |
| 1167                   | 5' GCTAGGTCGACGGAGTTTCTAAATTGGGCGGACCA 3'; reverse primer used in construction of pSSK13; SalI site underlined                                                                          |
| 1168                   | 5' GCTAGGTCGACGGCGAGTAACAAAGTACAAATAGTTGCTTT 3'; forward primer used in construction of pSSK18; SalI site underlined                                                                    |
| 1169                   | 5' GCTAGGCATGCTGGTTGTCGATTGCTTCTAGATACAGTTAT 3'; reverse primer used in construction of pSSK18; SphI site underlined                                                                    |
| 1170                   | 5' GCTAGTCTAGACTGAGCAGTACCGCCCATATTCCA 3'; forward primer used in construction of pSSK15; XbaI site underlined                                                                          |
| 1250                   | 5' GCTAGGTCGACGAGCAAATGGAGTTGTAATACAGGA 3'; reverse primer used in construction of pSSK29; SalI site underlined                                                                         |

---

|      |                                                                                                                                  |
|------|----------------------------------------------------------------------------------------------------------------------------------|
| 1251 | 5' <u>GCTAGTCTAGA</u> AGTTTACATCCCAACCTTACCAG3'; forward primer used in construction of pSSK29; XbaI site underlined             |
| 1252 | 5' GCTAGGCATGCCTGCTGCAAATTCCTAAAAGC 3'; reverse primer used in construction of pSSK33; SphI site underlined                      |
| 1253 | 5' <u>GCTAGGTCGAC</u> AGCAGATGCCTGAATCGTATACATACC 3'; forward primer used in construction of pSSK33; SalI site underlined        |
| 1423 | 5' <u>GCTAGGGATCC</u> TTTACTCAATTATGTATGTCTGGAGAC 3'; forward primer used in construction of pSSK38; BamHI site underlined       |
| 1424 | 5' GCTAGGTCGACAAGGATGCCTAATAAGGCTTTATTTTT 3'; reverse primer used in construction of pSSK38; SalI site underlined                |
| 1425 | 5' <u>GCTAGGTCGACT</u> ACAAGACTTCAGGCATGTGCGGT 3'; forward primer used in construction of pSSK40; SalI site underlined           |
| 1426 | 5' <u>GCTAGGCATGCT</u> ATAATAATTAAGTCATTTCTCTTTG 3'; reverse primer used in construction of pSSK40; SphI site underlined         |
| 1512 | 5' <u>GCTAGGGTACC</u> GGAAGCTGGCTCAGGATTCTT 3'; forward primer used in construction of pYT351 and pYT353; KpnI site underlined   |
| 1515 | 5' <u>GCTAGGCATGC</u> CTGCTGTACCATTGCTAACC 3'; reverse primer used in construction of pLW01 and pYT351; SphI site underlined     |
| 1561 | 5' <u>GCTAGGCTAGC</u> ACAGATAATTTGAAGACATTAATACT 3'; forward primer used in construction of pSSK49; NheI site underlined         |
| 1562 | 5' <u>GCTAGCTCGA</u> GTTAGAAAATTCGGAGCATTTACATCCCA 3'; reverse primer used in construction of pSSK49; XhoI site underlined       |
| 1563 | 5' <u>GCTAGGCTAGC</u> ACAGAAAAATTTGACGAACTGATAAAG 3'; forward primer used in construction of pSSK50; NheI site underlined        |
| 1564 | 5' <u>GCTAGCTCGA</u> GTTAGTTTACATCCCAACCTTACC 3'; reverse primer used in construction of pSSK50; XhoI site underlined            |
| 1622 | 5' <u>GCTAGGGATCC</u> GAAAGCTTCGGTAATTGTAGCACAGG 3'; forward primer used in construction of pYT248; BamHI site underlined        |
| 1623 | 5' <u>GCTAGGTCGAC</u> TCTTTTTGCATTTGAGCATTGTC 3'; reverse primer used in construction of pYT248; SalI site underlined            |
| 1624 | 5' <u>GCTAGGTCGAC</u> AAAGATCATGCTGACGTAGAGTTG 3'; forward primer used in construction of pYT255; SalI site underlined           |
| 1625 | 5' <u>GCTAGGCATGCG</u> CATTTTCGTAATCAACTGTAACAT 3'; reverse primer used in construction of pYT255; SphI site underlined          |
| 1626 | 5' <u>GCTAGTCTAGA</u> GTACTTTGTTACTCGCCGCTGTG 3'; forward primer used in construction of pDE01; XbaI site underlined             |
| 1627 | 5' <u>GCTAGGTCGAC</u> GCGCTTTATAACTGATATCAGG 3'; reverse primer used in construction of pDE01; SalI site underlined              |
| 1628 | 5' <u>GCTAGGTCGAC</u> AGAGAATCTGGGTTAGAGCCGAAG 3'; forward primer used in construction of pDE02; SalI site underlined            |
| 1629 | 5' <u>GCTAGGCATGCG</u> GCAAGTTCTGTCCACATTGTAGC 3'; reverse primer used in construction of pDE02; SphI site underlined            |
| 1630 | 5' <u>GCTAGGGATCC</u> TCCTGTCTTCTAAAATCTCTGCGG 3'; forward primer used in construction of pYT249; BamHI site underlined          |
| 1631 | 5' <u>GCTAGGTCGAC</u> GTAGCTTCCCCAAAACCATATATGA 3'; reverse primer used in construction of pYT249; SalI site underlined          |
| 1632 | 5' <u>GCTAGGTCGAC</u> CAAATTCAGTCGTACAGATTCTTA 3'; forward primer used in construction of pYT256; SalI site underlined           |
| 1633 | 5' <u>GCTAGGCATGCG</u> GCTAAGTAAAAGGGCCAAAGGT 3'; reverse primer used in construction of pYT256 and pYT260; SphI site underlined |
| 1634 | 5' <u>GCTAGGGATCC</u> TTTACTCTCAACTTTTTACGATGGG 3'; forward primer used in construction of pYT250; BamHI site underlined         |
| 1635 | 5' <u>GCTAGGTCGAC</u> AAACTGTCCCCATTTGGTTTGAAC 3'; reverse primer used in construction of pYT250; SalI site underlined           |
| 1636 | 5' <u>GCTAGGTCGAC</u> TGAAAAACAAGGAATCAGCCAC 3'; forward primer used in construction of pYT257; SalI site underlined             |
| 1637 | 5' <u>GCTAGGCATGCG</u> GATAAGGTTTACGAAAAAATGCT 3'; reverse primer used in construction of pYT257; SphI site underlined           |
| 1650 | 5' <u>GCTAGGGATCC</u> TTGAATAATAACTTACTCCCGGC 3'; forward primer used in construction of pYT259; BamHI site underlined           |
| 1651 | 5' <u>GCTAGGCATGCC</u> CAACTACCTTATTTATCAACAATGTG 3'; reverse primer used in construction of pYT259; SphI site underlined        |
| 1652 | 5' <u>GCTAGGGATCC</u> CGATAACCACAAAAGGCGATTAC 3'; forward primer used in construction of pYT260; BamHI site underlined           |

---

|      |                                                                                                                          |
|------|--------------------------------------------------------------------------------------------------------------------------|
| 1871 | 5' <u>GCTAGGGTAC</u> CCTACACAACCTGTTGGAGGAAGA 3'; forward primer used in construction of pLW01; KpnI site underlined     |
| 1955 | 5' GCTAGGGT <u>ACC</u> ATCATTAAAGTAAGCACCCCATCG 3'; forward primer used in construction of pYT352; KpnI site underlined  |
| 1956 | 5' GCTAGGCATGCCCTTATCAGGCATAACTATATTTTAGG 3'; reverse primer used in construction of pYT352; SphI site underlined        |
| 1957 | 5' GCTAGGCATG <u>CC</u> GGCGAGTAAACAAAGTACAAATAG 3'; reverse primer used in construction of pYT353; SphI site underlined |

Table S4: X-ray Data Collection and Refinement Statistics

|                              | CusD <sub>I</sub> (Fjoh_4558)                           | CusD <sub>II</sub> (Fjoh_4561)                                               |
|------------------------------|---------------------------------------------------------|------------------------------------------------------------------------------|
| PDB                          | 5J90                                                    | 5J5U                                                                         |
| Resolution range (Å)         | 36.57 – 1.393                                           | 44.49 – 2.3                                                                  |
| Space group                  | P 21 21 21                                              | P 1                                                                          |
| Unit cell (Å)                | 79.33, 112.14, 121.57<br>$\alpha=\beta=\gamma=90^\circ$ | 82.71 82.89 93.91<br>$\alpha=66.4^\circ, \beta=78.3^\circ \gamma=67.6^\circ$ |
| Total reflections            | 1693675 (129785)                                        | 357070 (35307)                                                               |
| Unique reflections           | 215491 (21033)                                          | 91093 (9016)                                                                 |
| Multiplicity                 | 7.9 (6.2)                                               | 3.9 (3.9)                                                                    |
| Completeness (%)             | 99.81 (98.30)                                           | 97.26 (96.68)                                                                |
| Mean I/sigma(I)              | 26.56 (4.63)                                            | 7.88 (4.14)                                                                  |
| Wilson B-factor              | 11.53                                                   | 22.6                                                                         |
| $R_{\text{merge}}$           | 0.05585 (0.3396)                                        | 0.123 (0.3061)                                                               |
| $R_{\text{meas}}$            | 0.05968                                                 | 0.1424                                                                       |
| CC1/2                        | 0.998 (0.941)                                           | 0.986 (0.909)                                                                |
| CC*                          | 0.999 (0.985)                                           | 0.996 (0.976)                                                                |
| $R_{\text{work}}$            | 0.1503 (0.1911)                                         | 0.2139 (0.2566)                                                              |
| $R_{\text{free}}$            | 0.1673 (0.2213)                                         | 0.2626 (0.3454)                                                              |
| Number of non-hydrogen atoms | 9149                                                    | 14777                                                                        |
| macromolecules               | 7591                                                    | 14157                                                                        |
| ligand (ethylene glycol)     | 44                                                      | 0                                                                            |
| water                        | 1514                                                    | 620                                                                          |
| Protein residues             | 964                                                     | 1806                                                                         |
| RMS bonds (Å)                | 0.006                                                   | 0.009                                                                        |
| RMS angles (°)               | 1.08                                                    | 1.14                                                                         |
| Ramachandran favored (%)     | 97                                                      | 97                                                                           |
| Ramachandran allowed (%)     | 3                                                       | 3                                                                            |
| Ramachandran outliers (%)    | 0                                                       | 0                                                                            |
| Clashscore                   | 0.8                                                     | 3.1                                                                          |
| Average B-factor             | 15.7                                                    | 26                                                                           |
| macromolecules               | 13.5                                                    | 26                                                                           |
| ligands (ethylene glycol)    | 24.1                                                    |                                                                              |
| solvent                      | 26.4                                                    | 25.3                                                                         |

Values in parenthesis are for the highest resolution shell

## Figures

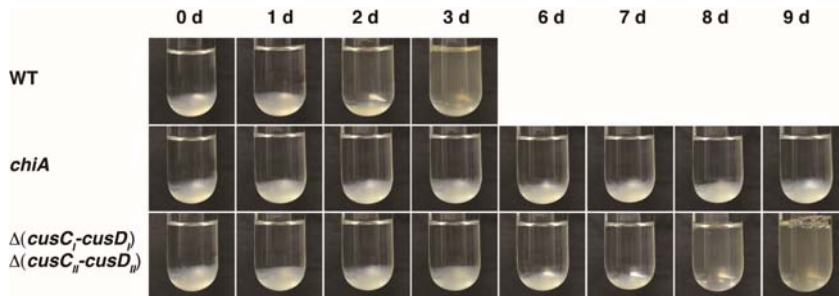

Figure S1: Chitin utilization of wild type *F. johnsoniae* and mutants. Chitin utilization was observed as the disappearance of insoluble chitin at the bottom of the test tubes, and growth was observed as increased turbidity throughout the culture. The *chiA* mutant was used as a negative control that exhibited no growth and no chitin conversion. Cells (0.02 ml,  $OD_{600}=1.0$ ) were introduced into 10 ml of Stanier medium supplemented with 0.05% chitin in 150 mm by 25 mm test tubes and incubated at 25°C. Growth experiments were performed in duplicate (with the same results) and one set of data is shown.

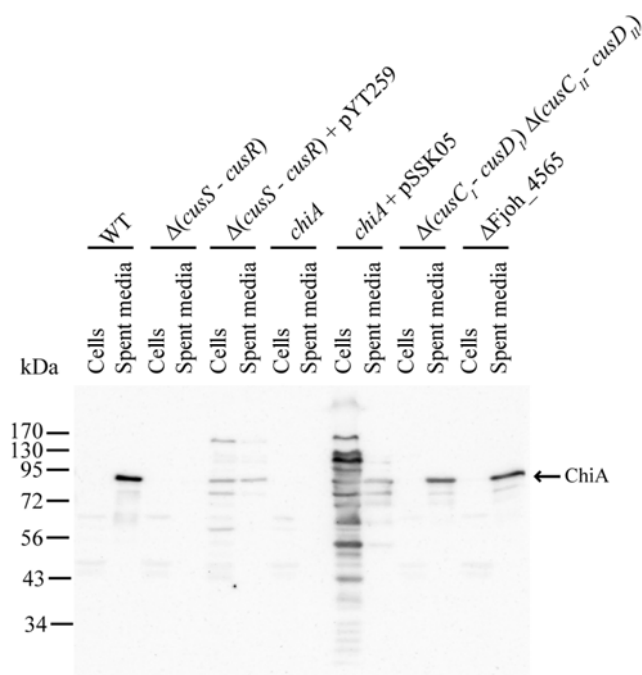

Figure S2: Western blot immunodetection of ChiA. *F. johnsoniae* wild type and mutant cells were grown overnight in motility medium at 25°C with shaking. Cells and supernatants (spent media) were separated by centrifugation. For whole cells, 10  $\mu$ g cell protein was loaded on gels. For secreted proteins, the amount of spent medium that contained 10  $\mu$ g cell protein before cell removal was loaded. Western blot analyses were performed using antibodies against ChiA at 1: 5,000 dilution. pYT259 expresses the two component signal transduction proteins CusS and CusR, and pSSK05 expresses ChiA. The observation of ChiA as a ~95 kDa band (the expected size is 169 kDa) is consistent with previous studies, which used the same antibodies as in

the current study, raised against a part of the N-terminal region of the protein [2]. The ChiUL does not encode proteases, and we assume that ChiA<sub>F</sub> is proteolytically cleaved by secreted proteases during growth, similar to how the well-studied *Serratia marcescens* chitinases are susceptible to cleavage by endogenously produced proteases, whereby chitinolytic activity is decreased [6, 7]. ChiA<sub>F</sub> does not exhibit detectable auto-lytic activities (no degradation observed by SDS-PAGE after incubation at 22°C for two days in 50 mM sodium phosphate, pH 6.5). Given that ChiA<sub>F</sub> is dramatically more active on chitin as full-length protein compared to the individual GH18 domains (ChiA<sub>N</sub> and ChiA<sub>C</sub>, singly or combined), it is likely that full-length ChiA is responsible for chitin utilization by *F. johnsoniae*. Further, the strong affinity of the middle region of ChiA (ChiA<sub>M</sub>, Figure 6) to chitin crystals, suggests that ChiA<sub>F</sub> is in intimate contact with the substrate during degradation. Note that only soluble fractions were analyzed in the Western blot immunodetection experiments. It is possible that ChiA<sub>F</sub>, protected from proteases while bound to its insoluble substrate, was not detected for this reason.

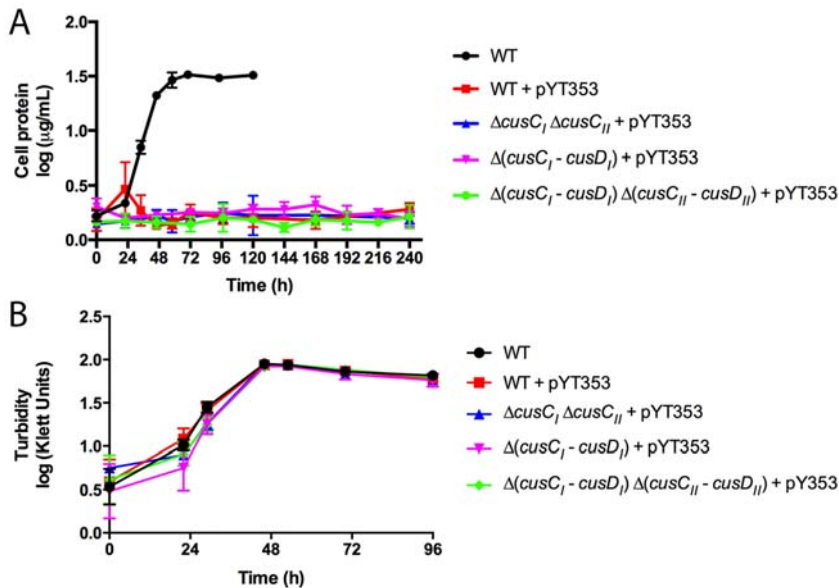

Figure S3: Growth curves of cells carrying pYT353 (*cusC<sub>I</sub>*) on chitin (A) and glucose (B). For growth on chitin, cells (0.1 ml,  $OD_{600}=1.0$ ) were introduced into 50 ml of Stanier medium supplemented with 0.05% chitin in 250-ml flasks, and incubated with shaking at 25°C. Growth presented as log ( $\mu\text{g}$  cell protein/ml). For growth on glucose, cells (0.1 ml,  $OD_{600}=1.0$ ) were introduced into 50 ml of Stanier medium supplemented with 0.1% glucose in 250-ml side-arm flasks and incubated with shaking at 25°C. Growth presented as log (Klett Units). Growth curves were performed in triplicate and error bars indicate standard deviations. pYT353 is derived from pCP23, which has a copy number of approximately 10 in *F. johnsoniae*.

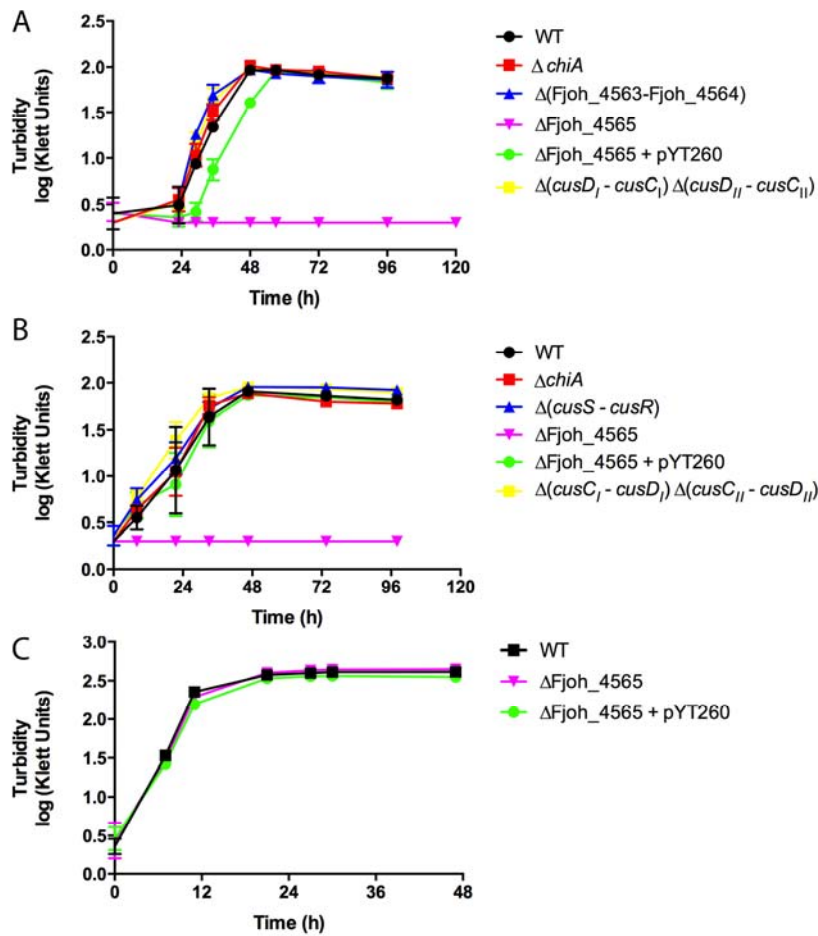

Figure S4: Growth curves of wild type cells and predicted cytoplasmic inner membrane sugar transporter mutants. *pYT260* expresses the predicted cytoplasmic membrane sugar transporter *Fjoh\_4565*. Cells (0.1 ml,  $OD_{600}=1.0$ ) were introduced into 50 ml of medium in 250-ml side-arm flasks and incubated with shaking at 25°C. A: Stanier medium supplemented with 0.1% glucose as sole source of carbon and energy. B: Stanier medium supplemented with 0.1% N-acetylglucosamine as sole source of carbon and energy. C: CYE medium. Growth presented as log (Klett Units). Growth curves were performed in triplicate and error bars indicate standard deviations.



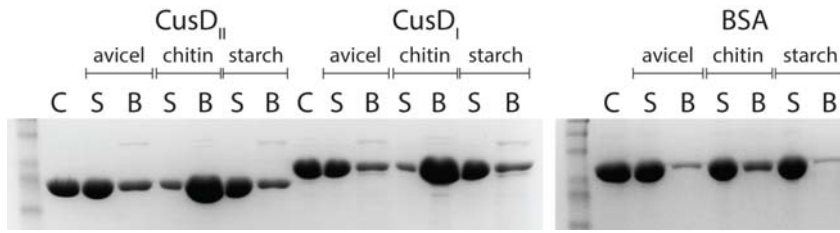

Figure S5: Binding analysis of the CusD proteins to insoluble polysaccharides. Lanes are labelled as C for control (protein incubated in buffer), S for soluble proteins after incubation with polysaccharides, and B for bound proteins, where the polysaccharides had been washed once in buffer and subsequently resuspended in SDS-PAGE loading buffer to release bound proteins. Bovine serum albumin (BSA) was used as a non-binding reference protein.

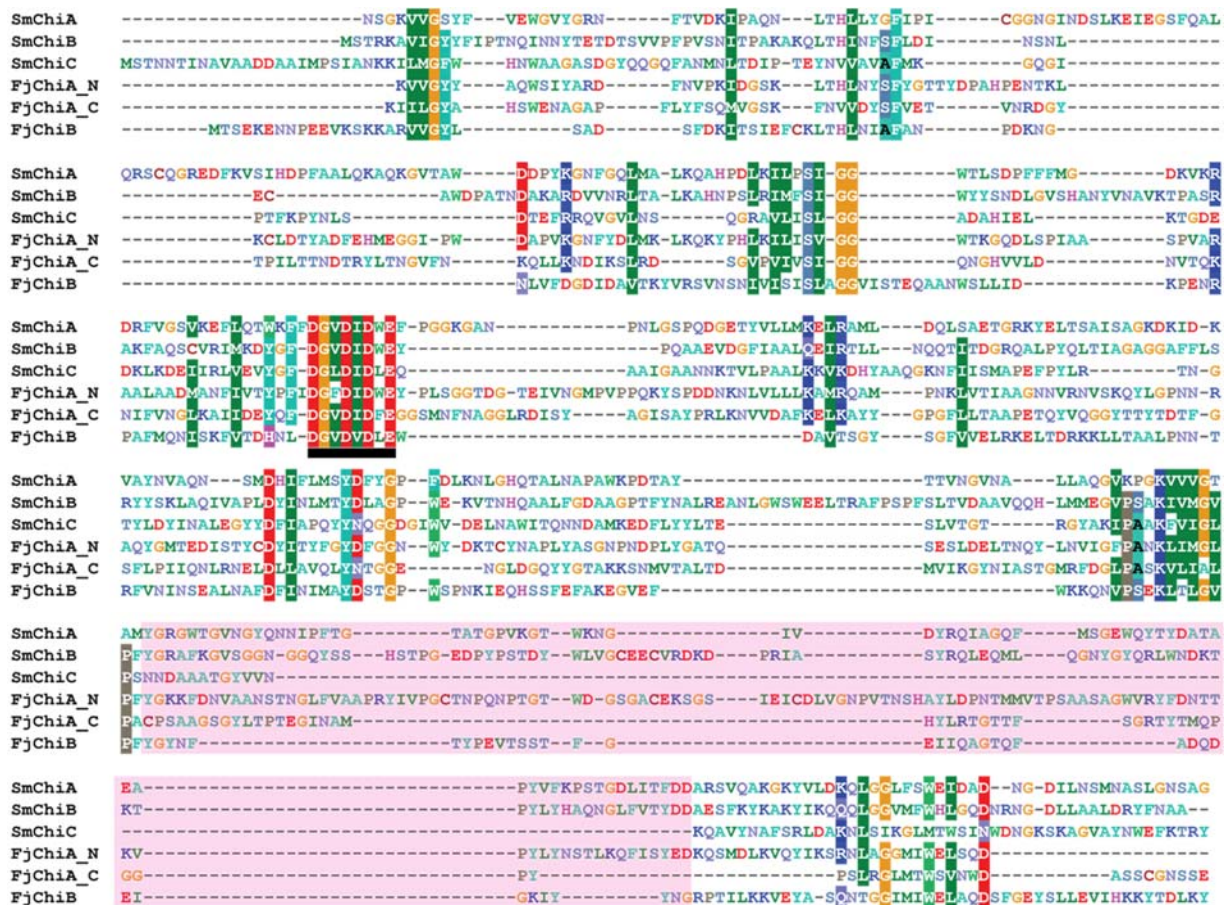

Figure S6: Section of a structural alignment of *Serratia marcescens* chitinases (ChiA, B and C) to which the ChiUL chitinase domains were added. The red box highlights the  $\alpha\beta$ -insert region. The characteristic catalytic motif, DXXDXDXE, is indicated by a black bar. The alignment was prepared using Clustal Omega [8], manually edited and displayed using BioEdit.

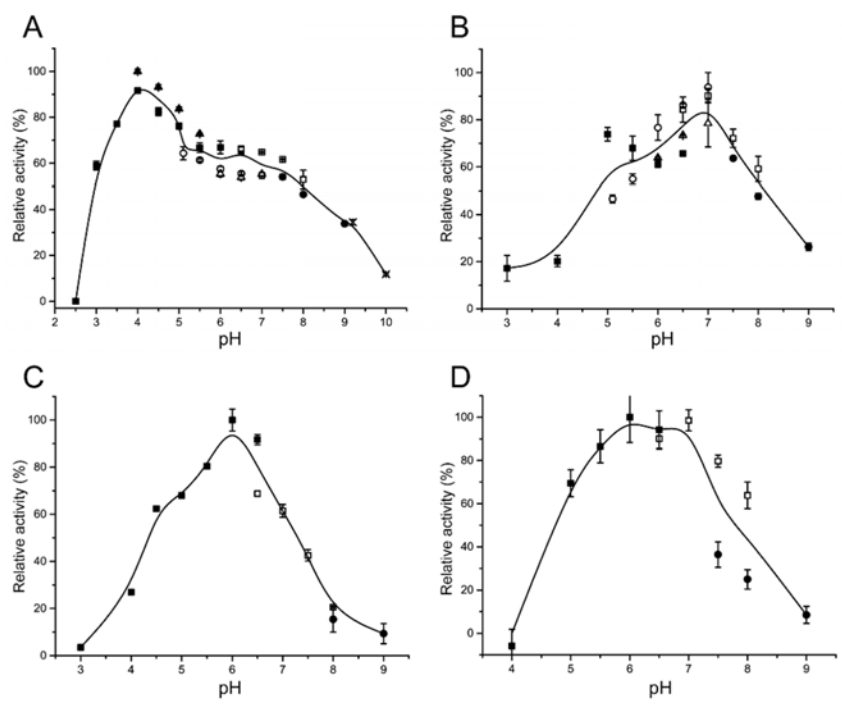

Figure S7: pH profiles for all enzymes. A: ChiA\_N, B: ChiA\_C, C: ChiB, D: GH20. The buffers (50 mM) used were: citrate (closed squares), sodium phosphate (open squares), tris (closed circles), MES (open circles), sodium acetate (closed triangles), Bis-Tris (open triangles), and sodium carbonate (crosses). The substrate was chitotetraose and the incubation temperature was 25°C. Data points are the average of duplicate experiments and error bars represent the standard error of the mean.

## References

1. Bolivar F, Backman K: **Plasmids of *Escherichia coli* as cloning vectors.** *Methods Enzymol* 1979, **68**:245-267.
2. Kharade SS, McBride MJ: ***Flavobacterium johnsoniae* chitinase ChiA is required for chitin utilization and is secreted by the type IX secretion system.** *J Bacteriol* 2014, **196**:961-970.
3. Rhodes RG, Pucker HG, McBride MJ: **Development and use of a gene deletion strategy for *Flavobacterium johnsoniae* to identify the redundant gliding motility genes *remF*, *remG*, *remH*, and *remI*.** *J Bacteriol* 2011, **193**:2418-2428.
4. Agarwal S, Hunnicutt DW, McBride MJ: **Cloning and characterization of the *Flavobacterium johnsoniae* (*Cytophaga johnsonae*) gliding motility gene, *gldA*.** *Proc Natl Acad Sci USA* 1997, **94**:12139-12144.
5. Figurski DH, Helinski DR: **Replication of an origin-containing derivative of plasmid RK2 dependent on a plasmid function provided in trans.** *Proc Natl Acad Sci USA* 1979, **76**:1648-1652.
6. Suzuki K, Sugawara N, Suzuki M, Uchiyama T, Katouno F, Nikaidou N, Watanabe T: **Chitinases A, B, and C1 of *Serratia marcescens* 2170 produced by recombinant *Escherichia coli*: enzymatic properties and synergism on chitin degradation.** *Biosci Biotechnol Biochem* 2002, **66**:1075-1083.
7. Suzuki K, Taiyoji M, Sugawara N, Nikaidou N, Henrissat B, Watanabe T: **The third chitinase gene (*chiC*) of *Serratia marcescens* 2170 and the relationship of its product to other bacterial chitinases.** *Biochem J* 1999, **343**:587-596.
8. Sievers F, Wilm A, Dineen D, Gibson TJ, Karplus K, Li W, Lopez R, McWilliam H, Remmert M, Soding J, et al: **Fast, scalable generation of high-quality protein multiple sequence alignments using Clustal Omega.** *Mol Syst Biol* 2011, **7**:539.
